# Supplementary material for: ApoE Polymorphism Analysis in Health and Disease of South Asian Populations
Source: Research Square preprint supplement (doi:10.21203/rs.3.rs-5554316/v1), 2025-07-02
Supplement: Supplementary file 3 [file 40007b4262c8e3608f662b0b.docx]

S1_Appendix Calculation of log(OR)

| Genotype | Test of Association- z value (p value), Test of Heterogeneity- I2 in % | | | | | | | | | | | | | |
| --- | --- | --- | --- | --- | --- | --- | --- | --- | --- | --- | --- | --- | --- | --- |
| AD (11) | CAD (8) | VaD (8) | DLB (2) | FTD (2) | MCI (2) | PD (2) | Stroke (3) | DM (3) | Dyslipidemia (2) | Metabolic Syndrome (2) | Obesity (2) | Depression (1) | TBI (1) |
| APOE ε2/ε2 | 0.11 (0.92), 0 | -1.62 (0.1), 1.74 | 0.64 (0.52), 0 | 0.51 (0.61), 0 | -0.58 (0.56), 48.62 | -0.63 ( 0.53), 0 | 0.33 (0.74), 0 | 0.14 (0.88), 0 | 0.77 (0.44), 0 | -0.11 (0.91), 0 | -0.2 (0.84), 0 | -0.54 (0.59), 0 | 0.33 (0.74), NA | -0.96 (0.34), NA |
| APOE ε2/ε3 | **-1.96 (0.05)**, 0 | -1.49 (0.14), 35.71 | -1.05 (0.29), 0 | -0.46 (0.65), 0 | -1.42 (0.16), 30.35 | -0.54 (0.59), 87.30 | -1.94 (0.05), 0 | -1.46 (0.15), 0 | -0.78 (0.43), 0 | -0.04 (0.97), 92.66 | 0.25 (0.8), 48.04 | 0.94 (0.35), 22.2 | 0.48 (0.63), NA | 0.98 (0.33), NA |
| APOE ε2/ε4 | **2.06 (0.04)**, 35.34 | 1.11 (0.26), 46.77 | 1.65 (0.1), 0 | 1.39 (0.16), 0 | 0.72 (0.47), 57.11 | 1.17 (0.24), 48.25 | 0.32 (0.75), 0 | **3.09 (<0.001)**, 0 | 0.76 (0.45), 0 | -1.06 (0.29), 0 | 0.33 (0.74), 0 | -0.41 (0.68), 0 | 0.33 (0.74), NA | 1.65 (0.1), NA |
| APOE ε3/ε3 | ref | ref | ref | ref | ref | ref | ref | ref | ref | ref | ref | ref | ref | ref |
| APOE ε3/ε4 | **5.45 (<0.001)**, 80.09 | **3.16 (<0.001)**, 80.4 | **3.07 (<0.001)**, 0 | 0.78 (0.43), 80.72 | 0.69 (0.49), 90.77 | **2.97 (<0.001)**, 30.52 | **5.85 (<0.001)**, 0 | 1.09 (0.28), 70.71 | -1.21 (0.23), 0 | -0.21 (0.83), 0 | 1.37 (0.17), 0 | 0.6 (0.55), 0 | 1.5 (0.13), NA | -0.46 (0.65), NA |
| APOE ε4/ε4 | **4.13 (<0.001)**, 52.92 | 1.69 (0.09), 64.28 | **2.81 (<0.001)**, 22.43 | 1.67 (0.1), 76.23 | 0.31 (0.76), 79.92 | 0.53 (0.6), 0 | 1.35 (0.18), 15.23 | 0.32 (0.75), 0 | -0.04 (0.97), 0 | **2.61 (0.01)**, 0 | 1.43 (0.15), 0 | **2.44 (0.01)**, 0 | 0.33 (0.74), NA | -0.31 (0.75), NA |
