# Supplementary material for: ApoE Polymorphism Analysis in Health and Disease of South Asian Populations
Source: Research Square preprint supplement (doi:10.21203/rs.3.rs-5554316/v1), 2025-07-02
Supplement: Supplementary file 4 [file 8203cdabea669a0f67758b31.docx]

S3_Appendix Risk of Bias Assessment of Studies

| **Article** | **Author(s)** | **Study Type** | **Total Score** | **Selection: Representativeness** | **Selection: Sample Size** | **Selection: Non-respondents** | **Selection: Exposure Ascertainment** | **Comparability** | **Outcome: Assessment** | **Outcome: Statistical Test** |
| --- | --- | --- | --- | --- | --- | --- | --- | --- | --- | --- |
| **Apolipoprotein E Polymorphism and Dementia: A Hospital-Based Study from Southern India** | **Bharath et al. (2010)** | Case-control study | **9/10** | **1**: Representative dementia population in Southern India. | **1**: Sufficient sample (212 cases, 195 controls). | **0**: Non-respondents not reported. | **2**: PCR-based RFLP genotyping validated. | **2**: Controlled for age and gender. | **2**: HMSE, EASI, and CDR validated tools. | **1**: Chi-square, t-tests applied correctly. |
| **Apolipoprotein E Gene Polymorphism in Indian Patients with Alzheimer’s Disease and Vascular Dementia** | **Luthra et al. (2004)** | Case-control study | **8/10** | **1**: Patients from hospital in North India. | **1**: Sufficient (n=54: 29 AD, 25 VaD cases; 76 controls). | **0**: Not addressed. | **2**: Genotyping with validated PCR methods. | **1**: Controlled for hypertension and demographics. | **2**: MMSE, BDR, and IADL validated outcomes. | **1**: Statistical tests appropriate and detailed. |
| **ApoE Genotypes: Risk Factor for Alzheimer’s Disease** | **Kapur et al. (2006)** | Case-control study | **7/10** | **1**: Small sample of Indian population. | **0**: Small sample (14 cases, 6 relatives, 46 controls). | **0**: Not mentioned. | **2**: PCR-RFLP validated genotyping. | **1**: Minimal control of confounders. | **2**: Cognitive impairment and lipid profile validated. | **1**: Chi-square and OR appropriate. |
| **APOE Distribution in World Populations: Data from India and the UK** | **Singh et al. (2006)** | Cross-sectional study | **8/10** | **1**: Broad regional representation (India, UK). | **1**: Adequate (497 India, 621 UK). | **0**: Not mentioned. | **2**: Isoelectric focusing validated for genotyping. | **1**: Controlled for geography, ethnicity. | **2**: Genotyping and cholesterol validated. | **1**: Statistical tests well-described. |
| **APOE Polymorphism in a Rural Older Population-Based Sample in India** | **Thelma et al. (2001)** | Cross-sectional study | **9/10** | **1**: Representative of rural Indian population. | **1**: Sufficient sample (n=4450). | **1**: High response rate (99.84%). | **2**: PCR-based genotyping validated. | **1**: Controlled for demographics and lifestyle. | **2**: Robust frequency distribution validated. | **1**: Statistical analyses well-reported. |
| **APOE and PON1 Variants in Myocardial Infarction in Pashtun Population** | **Rahman et al. (2023)** | Case-control study | **8/10** | **1**: Representative of Pashtun ethnic population. | **1**: Sample size (n=300: 200 cases, 100 controls). | **0**: Non-respondents not detailed. | **2**: MassARRAY genotyping validated. | **1**: Controlled for conventional MI risk factors. | **2**: SNPs linked with MI; validated outcomes. | **1**: Logistic regression appropriately used. |
| **APOE and Presenilin-1 Variants in Alzheimer’s Disease in India** | **Chandak et al. (2002)** | Case-control study | **8/10** | **1**: Urban population in Mumbai, India. | **1**: Adequate (49 cases, 100 controls). | **0**: Non-respondents not detailed. | **2**: PCR-based genotyping validated. | **1**: Minimal confounders controlled. | **2**: Dementia diagnosed using NINCDS-ADRDA. | **1**: Statistical tests appropriate. |
| **Tanguturi et al. (2013): ApoE Polymorphism and Myocardial Infarction** | **Tanguturi et al.** | Case-control study | **9/10** | **1**: Representative of South Indian population. | **1**: Sufficient (n=412: 202 cases, 210 controls). | **0**: Not reported. | **2**: Reliable PCR genotyping and lipid profiling. | **2**: Controlled for age, sex, smoking, alcohol; comorbidities partially addressed. | **2**: Diagnosis confirmed with clinical, biochemical, and ECG criteria. | **1**: Adequately described. |
| **Das et al. (2009): Synergistic Effects of ACE and ApoE Polymorphisms in Metabolic Syndrome** | **Das et al.** | Cross-sectional study | **8/10** | **1**: Representative of Kolkata population. | **1**: Acceptable but limited for stronger power. | **0**: Not detailed. | **2**: Reliable PCR-based genotyping. | **1**: Controlled for sex and age; other factors not addressed. | **2**: NCEP-ATP III criteria and biochemical measures. | **1**: Appropriate and detailed. |
| **Yousuf et al. (2015): ApoE Polymorphism in Traumatic Brain Injury (TBI)** | **Yousuf et al.** | Case-control study | **8/10** | **1**: Representative of Kashmiri population. | **1**: Sufficient (n=450: 150 cases, 300 controls). | **0**: Not mentioned. | **2**: PCR-RFLP-based genotyping. | **1**: Controlled for age, sex, and ethnicity. | **2**: GOS measured at 6 months; validated tool. | **1**: Clearly reported. |
| **Wozniak et al. (2009): ApoE and Pulmonary Tuberculosis in Women from the Indian Subcontinent** | **Wozniak et al.** | Case-control study | **7/10** | **1**: Small but representative of region. | **0**: Small sample size (n=129: 54 cases, 75 controls). | **0**: Not provided. | **2**: Reliable PCR-based genotyping. | **1**: Controlled for sex and age; socioeconomic factors not addressed. | **2**: TB confirmed microbiologically; outcomes well-defined. | **1**: Adequately described. |
| **s** | **Ganaie et al. (2020)** | Case-control study | **8/10** | **1**: Representative of rural Bengali population. | **1**: Adequate sample (148 cases, 108 controls). | **0**: Non-respondents not mentioned. | **2**: Validated PCR-RFLP methods used. | **1**: Controlled for age and sex only. | **2**: Diagnosis based on clinical and radiological findings. | **1**: Statistical tests (chi-square, OR) well-described. |
| **Association of APOE (Hha1) and ACE (I/D) Gene Polymorphisms with Type 2 Diabetes Mellitus in North West India** | **Singh et al. (2006)** | Case-control study | **8/10** | **1**: Representative of North West Indian population. | **1**: Sample size adequate (90 cases, 97 controls). | **0**: Non-respondents not reported. | **2**: PCR and RFLP methods validated. | **1**: Controlled for age, sex, and ethnicity; other factors not addressed. | **2**: Diagnosis based on WHO T2DM criteria. | **1**: Statistical tests (chi-square, OR, t-tests) applied appropriately. |
| **Apolipoprotein E Genotyping in the Malay, Chinese, and Indian Ethnic Groups in Malaysia** | **Seet et al. (2004)** | Cross-sectional study | **8/10** | **1**: Representative of Malaysian ethnic groups (Malay, Chinese, Indian). | **1**: Sample size sufficient (295 participants: 96 Malay, 171 Chinese, 28 Indian). | **0**: Non-respondents not addressed. | **2**: PCR-RFLP and agarose gel electrophoresis validated. | **1**: No adjustments for confounders (e.g., age, health status). | **2**: Genotypes (E3/E3, E3/E4, etc.) and allele frequencies assessed. | **1**: Descriptive statistics clearly presented. |
| **IL-6–174 G/C and ApoE Gene Polymorphisms in Alzheimer’s and Vascular Dementia Patients Attending AIIMS, New Delhi** | **Mansoori et al. (2010)** | Case-control study | **8/10** | **1**: Representative of urban population from a tertiary hospital in Delhi. | **1**: Adequate sample (74 AD, 46 VaD, 113 controls). | **0**: Non-respondents not reported. | **2**: PCR-based RFLP methods validated. | **1**: Controlled for age and sex; other confounders not addressed. | **2**: AD/VaD diagnosis based on NINCDS-ADRDA, NINDS-AIREN criteria. | **1**: Statistical tests (chi-square, OR, regression) appropriate. |
| **Evaluation of Apolipoprotein e4 Allele as a Susceptibility Factor for Neurodegenerative Diseases Among Eastern Indians** | **Sadhukhan et al. (2023)** | Case-control study | **9/10** | **1**: Representative of Eastern Indian population. | **1:** Sufficient sample (570 cases, 256 controls). | **0**: Non-respondents not addressed. | **2**: Validated PCR-RFLP and Sanger sequencing used. | **2**: Controlled for age, sex, and ethnicity. | **2**: BMSE and clinical diagnoses validated. | **1**: Statistical tests (Fisher, chi-square, OR) appropriate. |
| **Association of APOE Polymorphisms with Diabetes and Cardiometabolic Risk Factors** | **Sapkota et al. (2015)** | Case-control study | **9/10** | **1**: Representative of Punjabi Sikh population from AIDHS/SDS cohort. | **1:** Sufficient sample (1956 cases, 1608 controls). | **0**: Non-respondents not reported. | **2**: PCR-RFLP genotyping validated. | **2**: Controlled for age, BMI, and gender; other confounders adjusted. | **2**: T2D and cardiometabolic traits assessed by WHO criteria and standard assays. | **1**: Statistical tests (linear and logistic regression) appropriate and detailed. |
| **Apolipoprotein E Gene Polymorphism and Dyslipidaemia in Adult Asian Indians: A Population-Based Study from Calcutta, India** | **Das et al. (2008)** | Cross-sectional study | **8/10** | **1**: Representative of urban and suburban populations of Calcutta. | **1**: Adequate sample size (350 participants). | **0**: Non-respondents not reported. | **2**: PCR and agarose gel electrophoresis validated for genotyping. | **1**: Limited adjustments for confounding factors like age and sex. | **2**: Dyslipidaemia based on validated lipid profiles (e.g., LDLc, HDLc). | **1**: Statistical tests (ANOVA, chi-square) detailed and appropriate. |
| **Apolipoprotein E Gene Polymorphisms in Patients with Premature Myocardial Infarction: A Case-Controlled Study in Asian Indians in North India** | **Kumar et al. (2003)** | Case-control study | **8/10** | **1**: Representative of North Indian population. | **1**: Adequate sample size (35 MI cases, 45 controls). | **0**: Non-respondents not addressed. | **2**: PCR-RFLP validated for ApoE genotyping. | **1**: Controlled for age and sex; other factors not addressed. | **2**: MI diagnosis based on clinical, ECG, and biochemical criteria. | **1**: Logistic regression and chi-square used appropriately. |
| **Association Studies of Specific Cholesterol Related Genes (APOE, LPL, and CETP) with Lipid Profile and Memory Function** | **Periyasamy et al. (2017)** | Cross-sectional study | **8/10** | **1**: Representative of rural and tribal populations of Dharmapuri District, Tamil Nadu. | **1**: Adequate sample (52 rural, 135 tribal). | **0**: Non-respondents not mentioned. | **2**: PCR-RFLP validated genotyping for APOE, LPL, and CETP. | **1**: Adjusted for age, BMI, and location; other factors not addressed. | **2**: Memory symptoms assessed using CDR scale and lipid profiles validated. | **1**: Chi-square, t-tests, regression appropriately applied. |
| **Association Between APOE Genotypes and Metabolic Syndrome in a Middle-Aged and Elderly Urban South Indian Population** | **Azhuvalappil et al. (2024)** | Cross-sectional study | **9/10** | **1**: Representative of urban population aged 45+ in South India. | **2**: Large sample (618 participants). | **0**: Non-respondents not reported. | **2**: Validated PCR-RFLP and sequencing methods used. | **1**: Controlled for age, sex, and education; other lifestyle factors not considered. | **2**: MetS defined by NCEP ATP-III and Consensus criteria; validated biochemical measures. | **1**: Logistic regression and stratified analysis conducted. |
| **Sex-Specific Differences in the Association Between APOE Genotype and Metabolic Syndrome Among Middle-Aged and Older Rural Indians** | **Azhuvalappil et al. (2024)** | Cross-sectional study | **9/10** | **1**: Representative of rural Southern Indian population. | **1:** Sufficient sample (3,741 participants). | **0**: Non-respondents not reported. | **2**: PCR and Sanger sequencing validated genotyping. | **2**: Adjusted for age, sex, education, and lifestyle factors. | **2**: MetS defined by NCEP ATP-III and Consensus criteria; robust biochemical measures. | **1**: Chi-square, ANCOVA, logistic regression applied appropriately. |
| **Dementia and Diabetes Mellitus: Association with Apolipoprotein E4 Polymorphism from a Hospital in Southern India** | **Kota et al. (2012)** | Cross-sectional study | **8/10** | **1**: Representative of urban dementia patients from a tertiary care hospital. | **1**: Adequate sample (209 AD, 122 nAD, 70 f/hAD, 193 controls). | **0**: Non-respondents not reported. | **2**: PCR with sequence-specific primers validated for ApoE genotyping. | **1**: Controlled for age and sex; other factors not addressed. | **2**: Dementia diagnosed using ICD-10; DM based on medication use/self-report. | **1**: Chi-square, t-tests, Fisher's exact test used appropriately. |
| **Presenilin Gene Predisposes to Late-Onset Degenerative but Not Vascular Dementia** | **Pandey et al. (2007)** | Case-control study | **9/10** | **1**: Representative of dementia cases from a tertiary hospital in North India. | **1**: Adequate sample (107 dementia cases: 55 vascular, 52 degenerative; 162 controls). | **0**: Non-respondents not mentioned. | **2**: PCR and RFLP validated for PS1 and ApoE genotyping. | **2**: Controlled for age and sex; other confounders not addressed. | **2**: Diagnosis based on DSM-IV and neuroimaging. | **1**: Statistical tests (chi-square, OR) applied appropriately. |
| **APOE4 Allele in North Indian Elderly Patients with Dementia or Late-Onset Depression** | **Misra et al. (2019)** | Case-control study | **8/10** | **1**: Representative of elderly population from North India with dementia or depression. | **1**: Sample size (117 cases: 36 AD, 29 VD, 20 LOD; 32 controls). | **0**: Non-respondents not mentioned. | **2**: PCR-based genotyping using AflIII and HaeII restriction enzymes validated. | **1**: Controlled for age and sex; no adjustment for comorbidities. | **2**: DSM-5 criteria and HMSE for dementia; GDS for depression validated. | **1**: Fisher's exact test, chi-square, and t-tests appropriate. |
| **Association of CETP TaqI and APOE Polymorphisms with Type II Diabetes Mellitus in North Indians** | **Dixit et al. (2005)** | Case-control study | **8/10** | **1**: Representative of North Indian diabetic patients attending a tertiary care hospital. | **1**: Adequate sample (136 T2DM patients, 264 controls). | **0**: Non-respondents not reported. | **2**: PCR-RFLP validated genotyping for CETP TaqI B and APOE HhaI polymorphisms. | **1**: Controlled for age and sex; other factors not adjusted. | **2**: T2DM diagnosed per ADA criteria; lipid profiles validated using commercial kits. | **1**: Chi-square, ANOVA, and logistic regression applied appropriately. |
| **Analysis of CFH, TLR4, and APOE Polymorphism in India Suggests the Tyr402His Variant of CFH to be a Global Marker for Age-Related Macular Degeneration** | **Kaur et al. (2006)** | Case-control study | **9/10** | **1**: Representative of AMD patients from different states of India. | **1**: Adequate sample (100 AMD cases, 120 controls). | **0**: Non-respondents not addressed. | **2**: PCR-based genotyping validated; Sanger sequencing for validation. | **2**: Adjusted for age, gender, and diabetes. | **2**: AMD classified by AREDS criteria; fundus and angiographic validation. | **1**: Logistic regression, chi-square, and multivariate analysis used. |
| **Cholesterol Ester Transfer Protein and Apolipoprotein E Gene Polymorphisms in Hyperlipidemic Asian Indians in North India** | **Meena et al. (2011)** | Case-control study | **9/10** | **1**: Representative of hyperlipidemic and normolipidemic urban North Indians. | **1:** Sufficient sample (220 hyperlipidemic, 367 normolipidemic controls). | **0**: Non-respondents not reported. | **2**: PCR-RFLP validated genotyping for CETP TaqIB and ApoE. | **2**: Adjusted for age, BMI, WHR, and TSF; multivariate analysis performed. | **2**: Lipid profiles validated using enzymatic assays; strict case/control definitions. | **1**: Chi-square, ANOVA, regression appropriately used. |
| **Role of ApoE Gene Polymorphism and Nonconventional Biochemical Risk Factors Among Very Young Individuals Presenting with Acute Myocardial Infarction** | **Gupta et al. (2018)** | Case-control study | **8/10** | **1**: Representative of very young MI (yMI, ≤35 years) patients in India. | **1**: Adequate sample size (125 yMI, 111 oMI, 103 controls). | **0**: Non-respondents not reported. | **2**: PCR-SNP genotyping validated for ApoE polymorphisms. | **1**: Adjusted for age, BMI, and smoking history; no multivariate control. | **2**: MI defined using 3rd universal definition; validated lipid and biomarker profiles. | **1**: Chi-square, OR, and regression analysis appropriate. |
| **Influence of Apolipoprotein E Polymorphism on Susceptibility of Wilson Disease** | **Roy et al. (2017)** | Case-control study | **8/10** | **1**: Representative of Wilson disease (WD) patients from Eastern and Western India. | **1**: Adequate sample size (171 WD patients, 291 controls). | **0**: Non-respondents not mentioned. | **2**: PCR-RFLP and Sanger sequencing validated. | **1**: Adjusted for age and sex; other confounders not considered. | **2**: WD diagnosed using Sternleib's criteria; cognitive and behavioral assessments validated. | **1**: Logistic regression, chi-square, and t-tests applied appropriately. |
| **Apolipoproteins AI/B/E Gene Polymorphism and Their Plasma Levels in Patients with Coronary Artery Disease** | **Biswas et al. (2013)** | Case-control study | **8/10** | **1**: Representative of CAD patients from Eastern India. | **1**: Adequate sample size (150 CAD cases, 150 controls). | **0**: Non-respondents not addressed. | **2**: PCR-RFLP validated genotyping for ApoE, ApoAI, and ApoB. | **1**: Controlled for age, sex, smoking, and LDL-c; other factors not addressed. | **2**: CAD diagnosis based on clinical, ECG, and echocardiographic evidence. | **1**: Logistic regression, chi-square tests appropriately used. |
| **Apolipoprotein E Polymorphism in Southern Iran: E4 Allele in the Lowest Reported Amounts** | **Bazrgar et al. (2007)** | Cross-sectional study | **8/10** | **1**: Representative of healthy individuals in Fars Province, Southern Iran. | **1**: Sample size adequate (198 participants). | **0**: Non-respondents not mentioned. | **2**: PCR-based genotyping validated for ApoE alleles. | **1**: No specific adjustment for age, sex, or other confounders. | **2**: Allele frequencies (E2, E3, E4) assessed and compared to global populations. | **1**: Chi-square and Fisher’s exact test used appropriately. |
| **APOE, MTHFR, LDLR and ACE Polymorphisms Among Angami and Lotha Naga Populations of Nagaland, India** | **Murry et al. (2011)** | Cross-sectional study | **9/10** | **1**: Representative of Naga tribal populations (Angami and Lotha). | **1**: Adequate sample size (112 unrelated volunteers: 52 Lotha, 60 Angami). | **0**: Non-respondents not reported. | **2**: PCR-RFLP validated genotyping for ApoE, ACE, LDLR, MTHFR polymorphisms. | **2**: Adjusted for age and gender; confounders such as lifestyle addressed. | **2**: Allele/genotype distributions evaluated; Hardy-Weinberg equilibrium assessed. | **1**: Chi-square contingency test used to compare populations. |
| **ApoE Gene Polymorphism and Its Relationship with Coronary Artery Disease in Ethnic Kashmiri Population** | **Afroze et al. (2015)** | Case-control study | **9/10** | **1**: Representative of Kashmiri ethnic population attending a tertiary hospital. | **1:** Sufficient sample (200 CAD cases, 450 controls). | **0**: Non-respondents not addressed. | **2**: PCR-RFLP validated for ApoE genotyping. | **2**: Adjusted for age, sex, smoking, and lipid profiles. | **2**: CAD diagnosed via coronary angiography; biochemical lipid profiles validated. | **1**: Logistic regression, chi-square, and ORs used appropriately. |
| **Study of Apolipoprotein E Polymorphism in Normal Healthy Controls from Northern India** | **Chhabra et al. (2000)** | Cross-sectional study | **8/10** | **1**: Representative of healthy Northern Indian population. | **1**: Sample size adequate (122 healthy controls). | **0**: Non-respondents not reported. | **2**: PCR and HhaI digestion validated ApoE genotyping. | **1**: No confounders like age or sex adjusted; focus on allele/genotype frequencies. | **2**: ApoE genotype frequencies (ε2, ε3, ε4) assessed; Hardy-Weinberg equilibrium tested. | **1**: Monte Carlo method used; chi-square avoided due to small genotype frequencies. |
| **Restriction Isotyping of Apolipoprotein E Among Populations of Punjab, Northwestern India** | **Balgir and Kaur (2003)** | Cross-sectional study | **8/10** | **1**: Representative of caste-based groups in Punjab (Jats, Khatris, Brahmins, Baniyas, Others). | **1**: Sample size (165 participants, stratified by caste groups). | **0**: Non-respondents not addressed. | **2**: PCR and restriction isotyping validated genotyping. | **1**: No confounders (e.g., age, sex) controlled; caste-based focus. | **2**: Allele frequencies (E2, E3, E4) assessed; Hardy-Weinberg equilibrium tested. | **1**: Chi-square used to evaluate intragroup and intergroup homogeneity. |
| **Association of Cholesteryl Ester Transfer Protein (TaqIB) and Apolipoprotein E (HhaI) Gene Variants with Obesity** | **Srivastava et al. (2008)** | Case-control study | **9/10** | **1**: Representative of North Indian population attending outpatient clinics in Lucknow. | **1:** Sufficient sample (159 obese cases, 278 controls). | **0**: Non-respondents not addressed. | **2**: PCR-RFLP validated for CETP TaqIB and ApoE HhaI genotypes. | **2**: Adjusted for BMI, lipid profiles, and blood pressure. | **2**: Obesity defined by BMI; lipid and biochemical measures validated. | **1**: Chi-square, ANOVA, and logistic regression appropriately used. |
| **Prevalence of MTHFR, Factor V, ACE, and APOE Gene Polymorphisms Among Muslims of Manipur, India** | **Asghar et al. (2012)** | Cross-sectional study | **8/10** | **1**: Representative of Manipuri Muslim population. | **1**: Sample size (107 healthy unrelated participants). | **0**: Non-respondents not reported. | **2**: PCR and restriction digestion validated for genotyping. | **1**: No adjustment for age, sex, or environmental factors. | **2**: Genotype and allele frequencies assessed; Hardy-Weinberg equilibrium tested. | **1**: POPGENE and HAPLOPOP software used; chi-square applied appropriately. |
| **Thrombophilic Risk Factors Are Associated with Apolipoprotein E Gene Polymorphisms in Deep Vein Thrombosis Patients: An Indian Study** | **Rastogi et al. (2018)** | Case-control study | **9/10** | **1**: Representative of DVT patients from North India. | **1**: Adequate sample size (100 cases, 100 controls). | **0**: Non-respondents not addressed. | **2**: PCR-RFLP validated ApoE genotyping; Sanger sequencing for confirmation. | **2**: Adjusted for BMI, smoking, and clinical/circumstantial risk factors. | **2**: DVT confirmed by imaging; thrombophilia testing validated. | **1**: Chi-square, OR, and logistic regression applied appropriately. |
| **Analysis of MC4R rs17782313, POMC rs1042571, APOE-Hha1, and AGRP rs3412352 Genetic Variants with Susceptibility to Obesity Risk in North Indians** | **Srivastava et al. (2015)** | Case-control study | **9/10** | **1**: Representative of North Indian population. | **1:** Sufficient sample (396 obese cases, 300 controls). | **0**: Non-respondents not reported. | **2**: Genotyping validated using PCR-RFLP and Taqman assays. | **2**: Adjusted for age, sex, and BMI. | **2**: Obesity assessed using BMI ≥30 kg/m²; validated lipid profiles. | **1**: Logistic regression, MDR analysis, and chi-square applied appropriately. |
| **Association Between Apolipoprotein E Gene Polymorphism and Myocardial Infarction** | **Tanguturi et al. (2013)** | Case-control study | **9/10** | **1**: Representative of urban population of South India. | **1**: Adequate sample (202 MI patients, 210 controls). | **0**: Non-respondents not reported. | **2**: PCR-based genotyping validated. | **2**: Adjusted for age, sex, and clinical history; no multivariate adjustments. | **2**: MI diagnosed based on clinical, ECG, and biochemical markers. | **1**: Chi-square, OR, and ANOVA used appropriately. |
| **Lipid Profiles and Associated Gene Polymorphisms in Young Asian Indian Patients with Acute Myocardial Infarction and the Metabolic Syndrome** | **Ranjith et al. (2009)** | Cross-sectional study | **9/10** | **1**: Representative of young South African Asian Indian patients with AMI. | **1:** Sufficient sample (492 participants). | **0**: Non-respondents not addressed. | **2**: PCR-RFLP validated for ApoE, CETP, and LPL genotyping. | **2**: Adjusted for BMI, lipid levels, and metabolic syndrome criteria. | **2**: AMI and MetS diagnosed based on established NCEP ATP III and IDF guidelines. | **1**: Logistic regression, chi-square, and t-tests applied appropriately. |
| **Apolipoprotein E-e2 Confers Risk of Pulmonary Tuberculosis in Women from the Indian Subcontinent** | **Wozniak et al. (2009)** | Case-control study | **8/10** | **1**: Representative of Indian subcontinent women. | **1**: Small sample size (54 TB cases, 75 controls). | **0**: Non-respondents not addressed. | **2**: Genotyping performed using validated PCR-based methods. | **1**: Minimal adjustments; gender-focused analysis. | **2**: TB diagnosis confirmed microbiologically; allele frequencies assessed. | **1**: Chi-square and OR analysis used appropriately. |
| **Genetic Variation of ApoE Gene in Ethnic Kashmiri Population and Its Association with Outcome After Traumatic Brain Injury** | **Yousuf et al. (2015)** | Case-control study | **8/10** | **1**: Representative of ethnic Kashmiri population from tertiary care hospital. | **1**: Adequate sample size (150 TBI patients, 300 controls). | **0**: Non-respondents not addressed. | **2**: PCR-RFLP validated ApoE genotyping. | **1**: Adjusted for age, sex; no further confounders considered. | **2**: Outcomes assessed by Glasgow Outcome Scale at 6 months. | **1**: Chi-square and statistical tests applied appropriately. |
| **Synergistic Effects of ACE (I/D) and ApoE (HhaI) Gene Polymorphisms Among Adult Asian Indians with and without Metabolic Syndrome** | **Das et al. (2009)** | Cross-sectional study | **8/10** | **1**: Representative of urban population from Calcutta and suburbs. | **1**: Moderate sample size (350 participants, 138 genotyped). | **0**: Non-respondents not mentioned. | **2**: PCR-RFLP validated for ACE (I/D) and ApoE (HhaI) genotyping. | **1**: Minimal adjustment for age and sex; no multivariate controls. | **2**: Metabolic syndrome defined per NCEP-ATP III criteria with modifications. | **1**: Chi-square, ANOVA, and regression analysis applied appropriately. |
| **The Apolipoprotein E Polymorphism And Dyslipidemia In Elderly Patients Of Calcific Aortic Stenosis: A Case Control study** | **Afaq et al. 2023** | Case-control study | **9/10** | **1**: Representative of calcific AS patients and matched controls from Karachi. | **1**: Adequate sample (50 cases, 50 controls). | **0**: Non-respondents not addressed. | **2**: PCR-RFLP validated for ApoE genotyping. | **2**: Adjusted for age, sex; lipid profile comparison between groups. | **2**: Lipid profiles (TC, TG, LDL) validated; AS severity assessed by echocardiography. | **1**: Chi-square applied for allele frequencies; other tests not described. |
| **Screening of Candidate Coronary Artery Disease Genes in Pakistani Population** | **Asma Naseer Cheema (2017)** | Case-control study | **9/10** | **1**: Representative of CAD patients and controls from Pakistani population. | **1:** Sufficient sample (695 participants, including angiographically confirmed CAD cases). | **0**: Non-respondents not addressed. | **2**: Genotyping performed using Sequenom iPLEX and TaqMan assays. | **2**: Adjusted for age, sex, and other conventional risk factors. | **2**: CAD severity assessed by angiography and lipid profile; significant SNPs validated. | **1**: Chi-square, logistic regression, and multiple models applied. |
| **Apolipoprotein E Gene Isoforms Genetic Spectrum in Pakistani Survivors of Myocardial Infarction** | **Akhtar Ali et al. (2016)** | Case-control study | **9/10** | **1**: Representative of MI survivors and controls from Pakistan. | **1**: Adequate sample size (100 MI patients, 100 controls). | **0**: Non-respondents not addressed. | **2**: Genotyping performed using high-throughput TaqMan and KASPar assays. | **2**: Adjusted for age, sex, and lipid levels; other confounders partially addressed. | **2**: Lipid profiles (TC, LDL-C, HDL-C, TG) validated; MI confirmed by clinical, ECG, and biomarkers. | **1**: Statistical tests (chi-square, t-tests, Fisher’s exact) applied appropriately. |
| **Apolipoprotein E Polymorphism in India: High APOE*E3 Allele Frequency in Ramgarhia of Punjab** | **Singh et al. (2001)** | Cross-sectional study | **8/10** | **1**: Representative of Ramgarhia and Ramdasia ethnic groups in Punjab. | **1**: Moderate sample size (80 Ramgarhia, 70 Ramdasia). | **0**: Non-respondents not addressed. | **2**: High-resolution 2D gel electrophoresis and IEF-DG-PAGE validated for APOE genotyping. | **1**: No adjustments for confounding factors such as age or health. | **2**: APOE allele frequencies analyzed across ethnic groups with global comparison. | **1**: Regression analysis and global allele frequency comparisons applied appropriately. |
| **Association of APOE Gene Polymorphism with Stroke Patients from Rural Eastern India** | **Ganaie et al. (2020)** | Case-control study | **9/10** | **1**: Representative of ethnic Bengali population in rural India. | **1**: Adequate sample size (148 stroke patients, 108 controls). | **0**: Non-respondents not addressed. | **2**: PCR-RFLP validated for APOE genotyping. | **2**: Adjusted for age and sex; no multivariate adjustments for other confounders. | **2**: APOE allele frequencies (E2, E3, E4) and OR analysis for stroke types validated. | **1**: Chi-square, OR, and regression analyses used appropriately. |
| **Role of Apolipoprotein E, Cathepsin D, and Brain-Derived Neurotrophic Factor in Parkinson’s Disease: A Study from Eastern India** | **Pal et al. (2019)** | Case-control study | **9/10** | **1**: Representative of Eastern Indian PD patients and matched controls. | **1:** Sufficient sample (302 PD patients, 304 controls). | **0**: Non-respondents not reported. | **2**: Genotyping validated using PCR-RFLP and sequencing; functional assays included. | **2**: Adjusted for age, sex, and early/late onset classification. | **2**: APOE and BDNF polymorphisms significantly associated with PD risk; haplotype analysis conducted. | **1**: Chi-square, p-values, and luciferase assay applied appropriately. |
| **Apolipoprotein E Genetic Polymorphism and Stroke Subtypes in a Bangladeshi Hospital-Based Study** | **Chowdhury et al. (2001)** | Case-control study | **9/10** | **1**: Representative of hospital-based stroke patients in Dhaka, Bangladesh. | **1**: Adequate sample size (227 stroke cases, 190 controls). | **0**: Non-respondents not reported. | **2**: Genotyping performed via PCR-RFLP validated methods. | **2**: Adjusted for age, sex, skinfolds, smoking, hypertension, and diabetes. | **2**: Stroke subtypes (cortical thrombosis, embolism, and hemorrhage) validated by CT and clinical criteria. | **1**: Conditional logistic regression applied appropriately. |
