# Supplementary material for: ApoE Polymorphism Analysis in Health and Disease of South Asian Populations
Source: Research Square preprint supplement (doi:10.21203/rs.3.rs-5554316/v1), 2025-07-02
Supplement: Supplementary file 5 [file a06f1f63354dfb732a9a138c.docx]

**S2_Appendix Detailed Search Strategy**

**For PubMed:**

(("Apolipoproteins E"[MeSH] OR "APOE genotype" OR "APOE polymorphism" OR "APOE alleles")

AND ("Alleles"[MeSH] OR "Gene Frequency"[MeSH] OR "Polymorphism, Genetic"[MeSH])

AND ("South Asia" OR "South Asian" OR "India" OR "Nepal" OR "Bangladesh" OR "Pakistan" OR "Sri Lanka" OR "Bhutan" OR "Maldives")

AND ("Alzheimer Disease"[MeSH] OR "Coronary Disease"[MeSH] OR "Stroke"[MeSH] OR "Parkinson Disease"[MeSH] OR "Dementia"[MeSH] OR "Vascular Dementia" OR "Dementia with Lewy Bodies" OR "Frontotemporal Dementia" OR "Mild Cognitive Impairment"[MeSH] OR "Brain Injuries, Traumatic"[MeSH] OR "Diabetes Mellitus"[MeSH] OR "Metabolic Syndrome"[MeSH] OR "Obesity"[MeSH] OR "Depression"[MeSH]))

**For Embase:**

('apolipoprotein e'/exp OR 'apoe genotype' OR 'apoe polymorphism' OR 'apoe allele')

AND ('allele'/exp OR 'gene frequency'/exp OR 'genetic polymorphism'/exp)

AND ('south asia' OR 'south asian' OR 'india' OR 'nepal' OR 'bangladesh' OR 'pakistan' OR 'sri lanka' OR 'bhutan' OR 'maldives')

AND ('alzheimer disease'/exp OR 'coronary artery disease'/exp OR 'stroke'/exp OR 'parkinson disease'/exp OR 'dementia'/exp OR 'vascular dementia' OR 'dementia with lewy bodies' OR 'frontotemporal dementia' OR 'mild cognitive impairment'/exp OR 'traumatic brain injury'/exp OR 'diabetes mellitus'/exp OR 'metabolic syndrome'/exp OR 'obesity'/exp OR 'depression'/exp)
